# Supplementary material
Source: PubMed Central journal article supplement (PMC5005509)
Supplement: JCM.01410-16_zjm999095148so1.pdf [file JCM.01410-16_zjm999095148so1.pdf]

## 1 **Materials and Methods**

### 2 **PCR primer and probe design**

3 TaqMan quantitative (q) PCR assay design was based on sequence data held in GenBank  
4 nucleotide database (1). High quality, full-length *hsp65* gene sequences were available for 116  
5 of the 174 currently described NTM species. These included all 79 species that have been  
6 reported in human infections, of which 56 have been reported in the context of respiratory  
7 disease. Sequences were aligned using CLC Sequence Viewer version 7.6.1 (CLC Bio, Aarhus,  
8 Denmark) and candidate primer and probe combination designed using Primer3Plus web  
9 interface version 2.4.0 (2).

10 Primer/probe design was performed initially against *M. abscessus* (NCBI Reference Sequence:  
11 NZ\_CP009616.1). Based on sequence conservation across NTM species (as indicated by the  
12 sequence alignment, Figure S1) and sequence divergence in non-NTM species (Figure S2), a  
13 forward primer was designed to bind the 147-249 base region, and the reverse primer to bind  
14 the 510-580 base region of the *M. abscessus hsp65* gene.

15 Parameters for primer design were a length of 15-25 bases, a melting temperature of between  
16 55-65°C, and a GC content from 35-70% (3). Candidate primers were excluded if their  
17 annealing temperature differed by >3°C, or if there were more than 3 G or C residues at the 3'  
18 end (3). Primers with complete homology to the *M. abscessus* reference sequence were retained  
19 for further assessment. Parameters for probe design were a length of 15-25 bases, a melting  
20 temperature of between 66-70°C, and a GC content from 35-70%. Candidate probes were  
21 excluded if they had runs of four consecutive G residues or 6 consecutive A residues, two or  
22 more CC dinucleotides in the middle of the probe, or a G in residue in the second position on  
23 the 5' end. Both primer and probe sequences were assessed for dimer and hairpin formation  
24 using IDT OligoAnalyzer 3.1 (<http://sg.idtdna.com/calc/analyzer>).

25 Candidate primer/probe combinations were assessed *in silico* for their homology to the aligned  
26 NTM *hsp65* sequences, as well as to 40 other non-NTM control species representing closely  
27 related taxa (*Corynebacterium glucuronolyticum*, *Nocardia farcinica* and *Rhodococcus equi*),  
28 common respiratory pathogens (*Pseudomonas aeruginosa*, *Staphylococcus aureus*,  
29 *Streptococcus pyogenes*, *Tsukamurella tyrosinosolvans*, *Acinetobacter baumannii*,  
30 *Haemophilus influenzae*, *Bordetella bronchiseptica*) and *Mycobacterium tuberculosis* and  
31 *Mycobacterium leprae*. In each case, oligonucleotide annealing temperatures were determined  
32 using IDT Biophysics web interface version 1.02 (<http://biophysics.idtdna.com/>). Homology  
33 between primers and probe and human sequences were assessed using Basic Local Alignment  
34 Search Tool (BLAST) v.2.3.0 against the NCBI Human genomic plus transcript (Human G+T)  
35 database.

36

#### 37 **NTM and non-NTM control strains**

38 DNA extracts from 15 NTM isolates (3 reference strains and 12 clinical isolates) (Table 1)  
39 were used for assay assessment. In addition, closely related non-mycobacterial species (*R. equi*,  
40 *N. farcinica*, *C. glucuronolyticum*), common respiratory pathogens (*S. aureus*, *P. aeruginosa*,  
41 *H. influenzae*, *S. pneumoniae*), nine *M. tuberculosis* strains, *M. bovis* (BCG), *Escherichia coli*,  
42 and human placental DNA (Bioline, NSW, Australia) were used as controls (Table 1).

43

#### 44 **Clinical samples**

45 Forty-two isolates were obtained from patients suspected of having respiratory NTM  
46 infections, comprising 30 bronchoalveolar lavage (BAL) samples and 12 sputum samples  
47 (Table 2) with full ethical approval. In each case, sample portions were analysed by diagnostic  
48 microbiology, in accordance with standard diagnostic practice (4). In addition, a sample aliquot  
49 was frozen prior to DNA extraction and qPCR analysis.

50

## 51 **DNA extraction**

52 DNA extraction from bacterial isolates and clinical samples was performed using GenElute  
53 Bacterial Genomic DNA Kit (Sigma-Aldrich, Castle Hill, Australia). To maximise  
54 mycobacterial DNA yield, bead-beating was performed in a FastPrep-24 instrument (MP  
55 Biomedicals, USA) at 6.5 m/s for 45 seconds using 1x chrome bead (1mm diameter) (Diantree  
56 Scientific, St Helens, Australia) and 200 µg silica:zirconium bead (0.1 mm diameter) (Diantree  
57 Scientific). Bead-beating was followed by a 1 hour enzymatic lysis step using Gram-positive  
58 lysis solution (Sigma-Aldrich) to which lysozyme (final concentration 50mg/mL) (Sigma-  
59 Aldrich) and lysostaphin (final concentration 10mg/mL) (Sigma-Aldrich) were added. Samples  
60 were mixed by vortexing before incubation at 37°C for 1 hour. Other DNA extraction  
61 procedures were as in accordance with GenElute Bacterial Genomic DNA Kit (Sigma-Aldrich)  
62 manufacturer's instructions. DNA was eluted into 100µL of DNA-free water and  
63 concentrations were measured using a Qubit assay (Thermo Fisher Scientific, Scoresby,  
64 Australia) according to manufacturer's instructions.

65

## 66 **PCR amplification conditions**

67 The TaqMan probe (Sigma-Aldrich) was 5'-labelled with FAM and 3'-labelled with Black Hole  
68 Quencher. PCR reactions were performed using KAPA Probe Fast qPCR Master Mix (2x)  
69 ROX Low (GeneWorks, Thebarton, Australia) in 25 µl reaction volumes. Reactions comprised  
70 approximately 10 ng of DNA, each primer at a final concentration of 250 nM and probe at a  
71 final concentration of 300 nM. Reactions were performed using a QuantStudio 6 RT-PCR  
72 system (Thermo Fisher Scientific, Scoresby, Australia), with cycle conditions of 3 min at 95°C,  
73 followed by 45 cycles of 60 s at 95°C and 45 s at 60°C.

74

## 75 **Assessment of assay performance**

76 The sensitivity of the *hsp65* TaqMan assay was assessed using serial dilutions of *M. abscessus*  
77 DNA ( $3.3\text{-}3.3\times 10^{-6}$  ng/ $\mu\text{L}$ , 10-fold increments). The efficiency of the qPCR was assessed based  
78 on the coefficient of determination ( $R^2$ ) of template concentration plotted against cycle  
79 threshold ( $C_T$ ) value, amplification efficiency, E ( $E=10^{-1/\text{slope}}$ ), and consistency across replicate  
80 reactions.  $C_T$  values were converted to DNA template concentration by comparison with a *M.*  
81 *abscessus*-derived standard curve, generated concurrently. DNA concentration was then  
82 converted to colony forming unit per mL (CFU/mL) equivalents based on the genome mass of  
83 *M. abscessus* genome (ATCC 19977) and a single gene copy per cell. This analysis was  
84 performed in triplicate.

85 The inhibitory effect of purified human DNA was assessed by adding 40 ng/ $\mu\text{L}$  (final  
86 concentration) to the dilution series of *M. abscessus* isolate DNA. A similar procedure was  
87 carried out using DNA extracted from horse blood (Thermo Fisher Scientific, Scoresby,  
88 Australia) to assess blood inhibitors on the assay performance in detecting NTM. A fixed  
89 concentration of *M. abscessus* DNA of 10 ng/ $\mu\text{L}$  (final concentration) to a dilution series of  
90 horse blood, starting at 50% v/v. Assay inhibition by carryover of components from clinical  
91 samples was assessed by comparison of signal obtained from 10-fold dilution series of *M.*  
92 *abscessus* DNA ( $3.3$  to  $3.3\times 10^{-6}$  ng/ $\mu\text{L}$ ) spiked with culture-negative BAL sample DNA, to a  
93 final concentration of 32 ng/ $\mu\text{L}$ . The same procedure was carried out using DNA extracted  
94 from a culture- and qPCR-negative sputum sample DNA.

95 Agreement between NTM species detection by qPCR and standard diagnostic culture was  
96 assessed based on their application to a clinical sample collection. Amplicon length was  
97 confirmed by gel electrophoresis on a 1% (w/v) agarose gel (Bio-Rad, Hercules, California,  
98 USA). Electrophoretic bands were visualised using EZ-Vision Three DNA Dye (AMRESCO,  
99 Solon, USA) in a GeneGenius Bio Imaging System (Syngene, Frederick, USA) using

100 GeneSnap software (Syngene, version 6.04), with length determined relative to HyperLadder  
101 100bp Plus (Bioline). Amplicon specificity was confirmed for all positive reactions by Sanger  
102 sequencing (Genomics and Molecular Pathology, SA Pathology, Bedford Park, South  
103 Australia, Australia). Nucleotide sequences were assessed relative to the NTM alignment using  
104 CLC Sequence Viewer version 7.6.1. All statistical analyses were performed using GraphPad  
105 Prism version 6.00 for Windows, GraphPad Software, La Jolla California USA.

106

## 107 **References**

- 108 1. **Benson, D. A., M. Cavanaugh, K. Clark, I. Karsch-Mizrachi, D. J. Lipman, J.**  
109 **Ostell, and E. W. Sayers.** 2013. GenBank. *Nucleic Acids Res.* **41**:D36-42.
- 110 2. **Untergasser, A., H. Nijveen, X. Rao, T. Bisseling, R. Geurts, and J. A. Leunissen.**  
111 2007. Primer3Plus, an enhanced web interface to Primer3. *Nucleic Acids Res.*  
112 **35**:W71-4.
- 113 3. **Amissah, N.B, H. Packer, E. Prediger, and J. Sabel.** 2015. qPCR Application Guide,  
114 Experimental Overview, Protocol, Troubleshooting, 4th Edition, Integrated DNA  
115 Technologies.
- 116 4. **Griffith, D.E., T. Aksamit, B. A. Brown-Elliott, A. Catanzaro, C. Daley, F.**  
117 **Gordin, S. M. Holland, R. Horsburgh, G. Huitt, M. F. Iademarco, M. Iseman, K.**  
118 **Olivier, S. Ruoss, C. F. von Reyn, R. J. Jr. Wallace, K. Winthrop; ATS**  
119 **Mycobacterial Diseases Subcommittee; American Thoracic Society; Infectious**  
120 **Disease Society of America.** 2007. An official ATS/IDSA statement: diagnosis,  
121 treatment, and prevention of nontuberculous mycobacterial diseases. *Am. J. Respir.*  
122 *Crit. Care Med.* **175**:367-416.
