# Supplementary material
Source: PubMed Central journal article supplement (PMC5005509)
Supplement: JCM.01410-16_zjm999095148so2.pdf [file JCM.01410-16_zjm999095148so2.pdf]

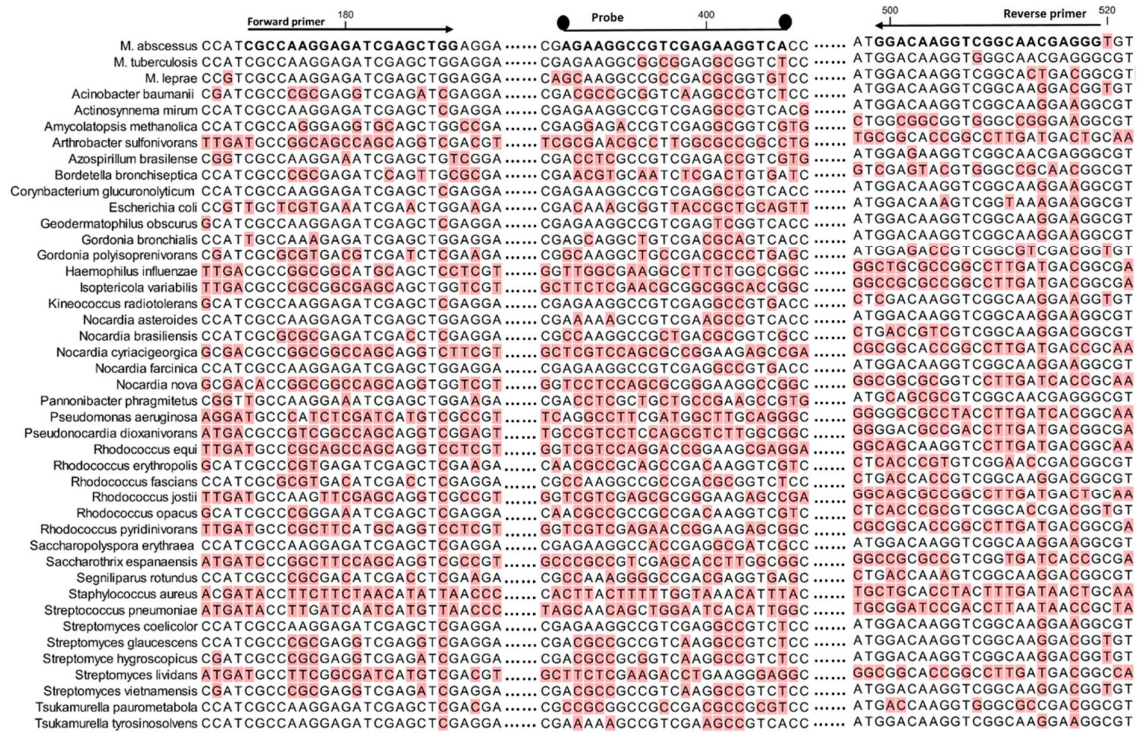

**Supplementary Figure 2:** Sequence alignment of the forward primer, reverse primer and probe to the *hsp65* gene region for 40 non-mycobacterial species, *M. abscessus*, *M. tuberculosis* and *M. leprae*. Red shading indicates nucleotide mismatches.

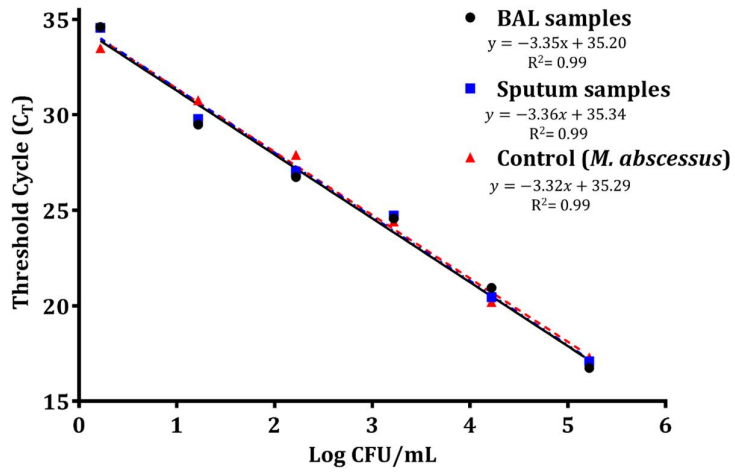

**Supplementary Figure 3:** Relationship between threshold  $C_T$  values and log CFU/mL in reactions spiked with DNA extracts from culture-negative BAL or sputum.  $C_T$  values are based on three independent replicates.

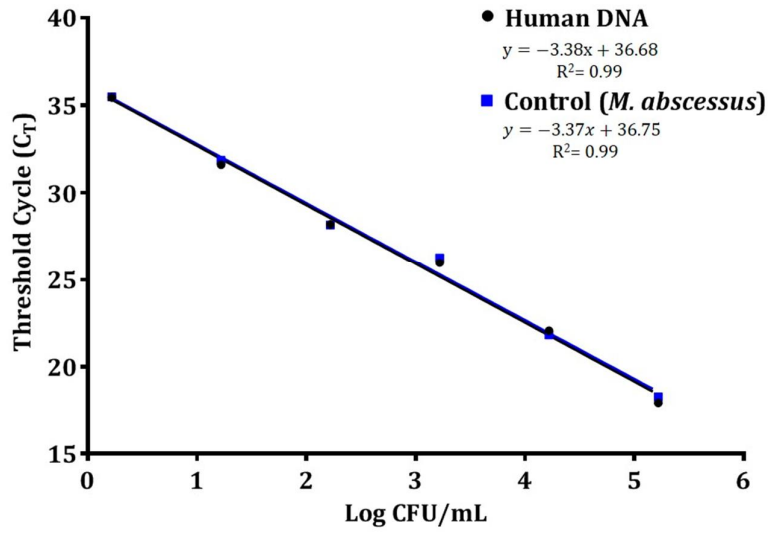

**Supplementary Figure 4.** Relationship between threshold C<sub>T</sub> values and log CFU/mL in reactions spiked with purified human DNA. C<sub>T</sub> values are based on three independent replicates.

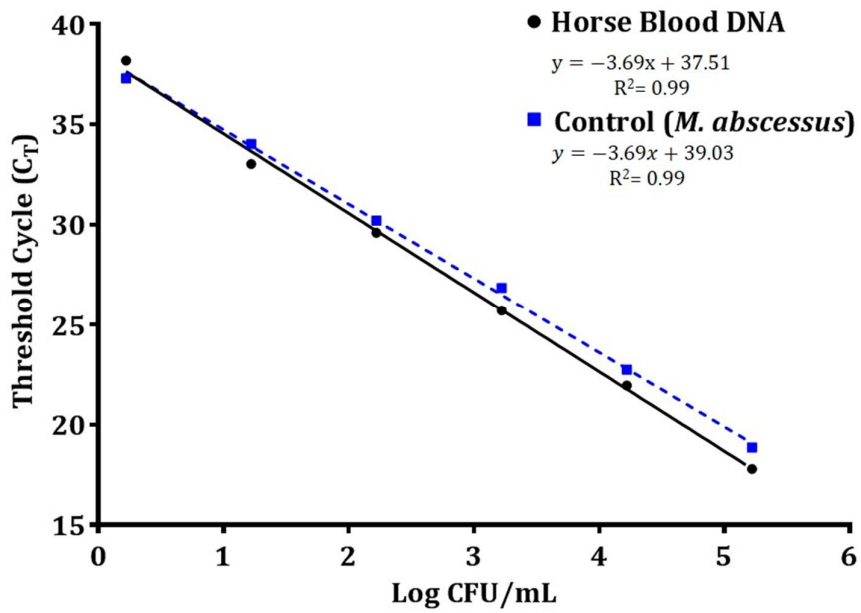

**Figure 5:** Relationship between threshold C<sub>T</sub> values and log CFU/mL in reactions spiked with horse blood. C<sub>T</sub> values are based on three independent replicates.

**Supplementary Table 1:** The 75 mycobacterial species with complete sequence homology at primer and probe binding sites

| <b><i>Mycobacterium</i> species</b> | <b>Forward sequence 5'-3'</b> | <b>Annealing temp (°C)</b> | <b>Probe sequence 5'-3'</b> | <b>Annealing temp (°C)</b> | <b>Reverse sequence 5'-3'</b> | <b>Annealing temp (°C)</b> |
|-------------------------------------|-------------------------------|----------------------------|-----------------------------|----------------------------|-------------------------------|----------------------------|
| <i>M. abscessus</i>                 | CGCCAAGGAGATCGAGCTGG          | 58                         | AGAAGGCCGTCGAGAAGGTCA       | 62.9                       | GGACAAGGTCGGCAACGAGGG         | 60                         |
| <i>M. agri</i>                      | CGCCAAGGAGATCGAGCTGG          | 58                         | AGAAGGCCGTCGAGAAGGTCA       | 62.9                       | GGACAAGGTCGGCAACGAGGG         | 60                         |
| <i>M. aromaticivorans</i>           | CGCCAAGGAGATCGAGCTGG          | 58                         | AGAAGGCCGTCGAGAAGGTCA       | 62.9                       | GGACAAGGTCGGCAACGAGGG         | 60                         |
| <i>M. arosiense</i>                 | CGCCAAGGAGATCGAGCTGG          | 58                         | AGAAGGCCGTCGAGAAGGTCA       | 62.9                       | GGACAAGGTCGGCAACGAGGG         | 60                         |
| <i>M. arupense</i>                  | CGCCAAGGAGATCGAGCTGG          | 58                         | AGAAGGCCGTCGAGAAGGTCA       | 62.9                       | GGACAAGGTCGGCAACGAGGG         | 60                         |
| <i>M. asiaticum</i>                 | CGCCAAGGAGATCGAGCTGG          | 58                         | AGAAGGCCGTCGAGAAGGTCA       | 62.9                       | GGACAAGGTCGGCAACGAGGG         | 60                         |
| <i>M. avium</i>                     | CGCCAAGGAGATCGAGCTGG          | 58                         | AGAAGGCCGTCGAGAAGGTCA       | 62.9                       | GGACAAGGTCGGCAACGAGGG         | 60                         |
| <i>M. boenickei</i>                 | CGCCAAGGAGATCGAGCTGG          | 58                         | AGAAGGCCGTCGAGAAGGTCA       | 62.9                       | GGACAAGGTCGGCAACGAGGG         | 60                         |
| <i>M. bohemicum</i>                 | CGCCAAGGAGATCGAGCTGG          | 58                         | AGAAGGCCGTCGAGAAGGTCA       | 62.9                       | GGACAAGGTCGGCAACGAGGG         | 60                         |
| <i>M. botniense</i>                 | CGCCAAGGAGATCGAGCTGG          | 58                         | AGAAGGCCGTCGAGAAGGTCA       | 62.9                       | GGACAAGGTCGGCAACGAGGG         | 60                         |
| <i>M. bouchedurhonense</i>          | CGCCAAGGAGATCGAGCTGG          | 58                         | AGAAGGCCGTCGAGAAGGTCA       | 62.9                       | GGACAAGGTCGGCAACGAGGG         | 60                         |
| <i>M. bovis</i>                     | CGCCAAGGAGATCGAGCTGG          | 58                         | AGAAGGCCGTCGAGAAGGTCA       | 62.9                       | GGACAAGGTCGGCAACGAGGG         | 60                         |
| <i>M. branderi</i>                  | CGCCAAGGAGATCGAGCTGG          | 58                         | AGAAGGCCGTCGAGAAGGTCA       | 62.9                       | GGACAAGGTCGGCAACGAGGG         | 60                         |
| <i>M. brisbanense</i>               | CGCCAAGGAGATCGAGCTGG          | 58                         | AGAAGGCCGTCGAGAAGGTCA       | 62.9                       | GGACAAGGTCGGCAACGAGGG         | 60                         |
| <i>M. brumae</i>                    | CGCCAAGGAGATCGAGCTGG          | 58                         | AGAAGGCCGTCGAGAAGGTCA       | 62.9                       | GGACAAGGTCGGCAACGAGGG         | 60                         |
| <i>M. caprae</i>                    | CGCCAAGGAGATCGAGCTGG          | 58                         | AGAAGGCCGTCGAGAAGGTCA       | 62.9                       | GGACAAGGTCGGCAACGAGGG         | 60                         |

**Supplementary Table 1, continued**

| <b>Mycobacterium Species</b> | <b>Forward sequence 5'-3'</b> | <b>Annealing temp (°C)</b> | <b>Probe sequence 5'-3'</b> | <b>Annealing temp (°C)</b> | <b>Reverse sequence 5'-3'</b> | <b>Annealing temp (°C)</b> |
|------------------------------|-------------------------------|----------------------------|-----------------------------|----------------------------|-------------------------------|----------------------------|
| <i>M. celatum</i>            | CGCCAAGGAGATCGAGCTGG          | 58                         | AGAAGGCCGTCGAGAAGGTCA       | 62.9                       | GGACAAGGTCGGCAACGAGGG         | 60                         |
| <i>M. chelonae</i>           | CGCCAAGGAGATCGAGCTGG          | 58                         | AGAAGGCCGTCGAGAAGGTCA       | 62.9                       | GGACAAGGTCGGCAACGAGGG         | 60                         |
| <i>M. chlorophenicum</i>     | CGCCAAGGAGATCGAGCTGG          | 58                         | AGAAGGCCGTCGAGAAGGTCA       | 62.9                       | GGACAAGGTCGGCAACGAGGG         | 60                         |
| <i>M. colombiense</i>        | CGCCAAGGAGATCGAGCTGG          | 58                         | AGAAGGCCGTCGAGAAGGTCA       | 62.9                       | GGACAAGGTCGGCAACGAGGG         | 60                         |
| <i>M. cookii</i>             | CGCCAAGGAGATCGAGCTGG          | 58                         | AGAAGGCCGTCGAGAAGGTCA       | 62.9                       | GGACAAGGTCGGCAACGAGGG         | 60                         |
| <i>M. cosmeticum</i>         | CGCCAAGGAGATCGAGCTGG          | 58                         | AGAAGGCCGTCGAGAAGGTCA       | 62.9                       | GGACAAGGTCGGCAACGAGGG         | 60                         |
| <i>M. crocinum</i>           | CGCCAAGGAGATCGAGCTGG          | 58                         | AGAAGGCCGTCGAGAAGGTCA       | 62.9                       | GGACAAGGTCGGCAACGAGGG         | 60                         |
| <i>M. diernhoferi</i>        | CGCCAAGGAGATCGAGCTGG          | 58                         | AGAAGGCCGTCGAGAAGGTCA       | 62.9                       | GGACAAGGTCGGCAACGAGGG         | 60                         |
| <i>M. doricum</i>            | CGCCAAGGAGATCGAGCTGG          | 58                         | AGAAGGCCGTCGAGAAGGTCA       | 62.9                       | GGACAAGGTCGGCAACGAGGG         | 60                         |
| <i>M. duvalii</i>            | CGCCAAGGAGATCGAGCTGG          | 58                         | AGAAGGCCGTCGAGAAGGTCA       | 62.9                       | GGACAAGGTCGGCAACGAGGG         | 60                         |
| <i>M. elephantis</i>         | CGCCAAGGAGATCGAGCTGG          | 58                         | AGAAGGCCGTCGAGAAGGTCA       | 62.9                       | GGACAAGGTCGGCAACGAGGG         | 60                         |
| <i>M. farcinogenes</i>       | CGCCAAGGAGATCGAGCTGG          | 58                         | AGAAGGCCGTCGAGAAGGTCA       | 62.9                       | GGACAAGGTCGGCAACGAGGG         | 60                         |
| <i>M. florentinum</i>        | CGCCAAGGAGATCGAGCTGG          | 58                         | AGAAGGCCGTCGAGAAGGTCA       | 62.9                       | GGACAAGGTCGGCAACGAGGG         | 60                         |
| <i>M. fluoranthenvorans</i>  | CGCCAAGGAGATCGAGCTGG          | 58                         | AGAAGGCCGTCGAGAAGGTCA       | 62.9                       | GGACAAGGTCGGCAACGAGGG         | 60                         |
| <i>M. fortuitum</i>          | CGCCAAGGAGATCGAGCTGG          | 58                         | AGAAGGCCGTCGAGAAGGTCA       | 62.9                       | GGACAAGGTCGGCAACGAGGG         | 60                         |
| <i>M. frederiksbergense</i>  | CGCCAAGGAGATCGAGCTGG          | 58                         | AGAAGGCCGTCGAGAAGGTCA       | 62.9                       | GGACAAGGTCGGCAACGAGGG         | 60                         |
| <i>M. gastri</i>             | CGCCAAGGAGATCGAGCTGG          | 58                         | AGAAGGCCGTCGAGAAGGTCA       | 62.9                       | GGACAAGGTCGGCAACGAGGG         | 60                         |

Supplementary Table 1, continued

| Mycobacterium Species    | Forward sequence 5'-3' | Annealing temp (°C) | Probe sequence 5'-3'  | Annealing temp (°C) | Reverse sequence 5'-3' | Annealing temp (°C) |
|--------------------------|------------------------|---------------------|-----------------------|---------------------|------------------------|---------------------|
| <i>M. genavense</i>      | CGCCAAGGAGATCGAGCTGG   | 58                  | AGAAGGCCGTCGAGAAGGTCA | 62.9                | GGACAAGGTCGGCAACGAGGG  | 60                  |
| <i>M. gilvum</i>         | CGCCAAGGAGATCGAGCTGG   | 58                  | AGAAGGCCGTCGAGAAGGTCA | 62.9                | GGACAAGGTCGGCAACGAGGG  | 60                  |
| <i>M. goodii</i>         | CGCCAAGGAGATCGAGCTGG   | 58                  | AGAAGGCCGTCGAGAAGGTCA | 62.9                | GGACAAGGTCGGCAACGAGGG  | 60                  |
| <i>M. gordonae</i>       | CGCCAAGGAGATCGAGCTGG   | 58                  | AGAAGGCCGTCGAGAAGGTCA | 62.9                | GGACAAGGTCGGCAACGAGGG  | 60                  |
| <i>M. haemophilum</i>    | CGCCAAGGAGATCGAGCTGG   | 58                  | AGAAGGCCGTCGAGAAGGTCA | 62.9                | GGACAAGGTCGGCAACGAGGG  | 60                  |
| <i>M. hassiacum</i>      | CGCCAAGGAGATCGAGCTGG   | 58                  | AGAAGGCCGTCGAGAAGGTCA | 62.9                | GGACAAGGTCGGCAACGAGGG  | 60                  |
| <i>M. heckeshornense</i> | CGCCAAGGAGATCGAGCTGG   | 58                  | AGAAGGCCGTCGAGAAGGTCA | 62.9                | GGACAAGGTCGGCAACGAGGG  | 60                  |
| <i>M. heidelbergense</i> | CGCCAAGGAGATCGAGCTGG   | 58                  | AGAAGGCCGTCGAGAAGGTCA | 62.9                | GGACAAGGTCGGCAACGAGGG  | 60                  |
| <i>M. holsaticum</i>     | CGCCAAGGAGATCGAGCTGG   | 58                  | AGAAGGCCGTCGAGAAGGTCA | 62.9                | GGACAAGGTCGGCAACGAGGG  | 60                  |
| <i>M. houstonense</i>    | CGCCAAGGAGATCGAGCTGG   | 58                  | AGAAGGCCGTCGAGAAGGTCA | 62.9                | GGACAAGGTCGGCAACGAGGG  | 60                  |
| <i>M. interjectum</i>    | CGCCAAGGAGATCGAGCTGG   | 58                  | AGAAGGCCGTCGAGAAGGTCA | 62.9                | GGACAAGGTCGGCAACGAGGG  | 60                  |
| <i>M. intermedium</i>    | CGCCAAGGAGATCGAGCTGG   | 58                  | AGAAGGCCGTCGAGAAGGTCA | 62.9                | GGACAAGGTCGGCAACGAGGG  | 60                  |
| <i>M. kansasii</i>       | CGCCAAGGAGATCGAGCTGG   | 58                  | AGAAGGCCGTCGAGAAGGTCA | 62.9                | GGACAAGGTCGGCAACGAGGG  | 60                  |
| <i>M. komossense</i>     | CGCCAAGGAGATCGAGCTGG   | 58                  | AGAAGGCCGTCGAGAAGGTCA | 62.9                | GGACAAGGTCGGCAACGAGGG  | 60                  |
| <i>M. koreense</i>       | CGCCAAGGAGATCGAGCTGG   | 58                  | AGAAGGCCGTCGAGAAGGTCA | 62.9                | GGACAAGGTCGGCAACGAGGG  | 60                  |
| <i>M. kubicae</i>        | CGCCAAGGAGATCGAGCTGG   | 58                  | AGAAGGCCGTCGAGAAGGTCA | 62.9                | GGACAAGGTCGGCAACGAGGG  | 60                  |
| <i>M. kumamotonense</i>  | CGCCAAGGAGATCGAGCTGG   | 58                  | AGAAGGCCGTCGAGAAGGTCA | 62.9                | GGACAAGGTCGGCAACGAGGG  | 60                  |



Supplementary Table 1, continued

| Mycobacterium Species      | Forward sequence 5'-3' | Annealing temp (°C) | Probe sequence 5'-3'  | Annealing temp (°C) | Reverse sequence 5'-3' | Annealing temp (°C) |
|----------------------------|------------------------|---------------------|-----------------------|---------------------|------------------------|---------------------|
| <i>M. kyorinense</i>       | CGCCAAGGAGATCGAGCTGG   | 58                  | AGAAGGCCGTCGAGAAGGTCA | 62.9                | GGACAAGGTCGGCAACGAGGG  | 60                  |
| <i>M. lacus</i>            | CGCCAAGGAGATCGAGCTGG   | 58                  | AGAAGGCCGTCGAGAAGGTCA | 62.9                | GGACAAGGTCGGCAACGAGGG  | 60                  |
| <i>M. lentiflavum</i>      | CGCCAAGGAGATCGAGCTGG   | 58                  | AGAAGGCCGTCGAGAAGGTCA | 62.9                | GGACAAGGTCGGCAACGAGGG  | 60                  |
| <i>M. lepraemurium</i>     | CGCCAAGGAGATCGAGCTGG   | 58                  | AGAAGGCCGTCGAGAAGGTCA | 62.9                | GGACAAGGTCGGCAACGAGGG  | 60                  |
| <i>M. longobardum</i>      | CGCCAAGGAGATCGAGCTGG   | 58                  | AGAAGGCCGTCGAGAAGGTCA | 62.9                | GGACAAGGTCGGCAACGAGGG  | 60                  |
| <i>M. malmoense</i>        | CGCCAAGGAGATCGAGCTGG   | 58                  | AGAAGGCCGTCGAGAAGGTCA | 62.9                | GGACAAGGTCGGCAACGAGGG  | 60                  |
| <i>M. mantenii</i>         | CGCCAAGGAGATCGAGCTGG   | 58                  | AGAAGGCCGTCGAGAAGGTCA | 62.9                | GGACAAGGTCGGCAACGAGGG  | 60                  |
| <i>M. mucogenicum</i>      | CGCCAAGGAGATCGAGCTGG   | 58                  | AGAAGGCCGTCGAGAAGGTCA | 62.9                | GGACAAGGTCGGCAACGAGGG  | 60                  |
| <i>M. murale</i>           | CGCCAAGGAGATCGAGCTGG   | 58                  | AGAAGGCCGTCGAGAAGGTCA | 62.9                | GGACAAGGTCGGCAACGAGGG  | 60                  |
| <i>M. neoaurum</i>         | CGCCAAGGAGATCGAGCTGG   | 58                  | AGAAGGCCGTCGAGAAGGTCA | 62.9                | GGACAAGGTCGGCAACGAGGG  | 60                  |
| <i>M. noviomagense</i>     | CGCCAAGGAGATCGAGCTGG   | 58                  | AGAAGGCCGTCGAGAAGGTCA | 62.9                | GGACAAGGTCGGCAACGAGGG  | 60                  |
| <i>M. novocastrense</i>    | CGCCAAGGAGATCGAGCTGG   | 58                  | AGAAGGCCGTCGAGAAGGTCA | 62.9                | GGACAAGGTCGGCAACGAGGG  | 60                  |
| <i>M. obuense</i>          | CGCCAAGGAGATCGAGCTGG   | 58                  | AGAAGGCCGTCGAGAAGGTCA | 62.9                | GGACAAGGTCGGCAACGAGGG  | 60                  |
| <i>M. palustre</i>         | CGCCAAGGAGATCGAGCTGG   | 58                  | AGAAGGCCGTCGAGAAGGTCA | 62.9                | GGACAAGGTCGGCAACGAGGG  | 60                  |
| <i>M. paraffinicum</i>     | CGCCAAGGAGATCGAGCTGG   | 58                  | AGAAGGCCGTCGAGAAGGTCA | 62.9                | GGACAAGGTCGGCAACGAGGG  | 60                  |
| <i>M. parascrofulaceum</i> | CGCCAAGGAGATCGAGCTGG   | 58                  | AGAAGGCCGTCGAGAAGGTCA | 62.9                | GGACAAGGTCGGCAACGAGGG  | 60                  |

**Supplementary Table 1, continued**

| <b>Mycobacterium Species</b> | <b>Forward sequence 5'-3'</b> | <b>Annealing temp (°C)</b> | <b>Probe sequence 5'-3'</b> | <b>Annealing temp (°C)</b> | <b>Reverse sequence 5'-3'</b> | <b>Annealing temp (°C)</b> |
|------------------------------|-------------------------------|----------------------------|-----------------------------|----------------------------|-------------------------------|----------------------------|
| <i>M. pulveris</i>           | CGCCAAGGAGATCGAGCTGG          | 58                         | AGAAGGCCGTCGAGAAGGTCA       | 62.9                       | GGACAAGGTCGGCAACGAGGG         | 60                         |
| <i>M. salmoniphilum</i>      | CGCCAAGGAGATCGAGCTGG          | 58                         | AGAAGGCCGTCGAGAAGGTCA       | 62.9                       | GGACAAGGTCGGCAACGAGGG         | 60                         |
| <i>M. septicum</i>           | CGCCAAGGAGATCGAGCTGG          | 58                         | AGAAGGCCGTCGAGAAGGTCA       | 62.9                       | GGACAAGGTCGGCAACGAGGG         | 60                         |
| <i>M. shimoidei</i>          | CGCCAAGGAGATCGAGCTGG          | 58                         | AGAAGGCCGTCGAGAAGGTCA       | 62.9                       | GGACAAGGTCGGCAACGAGGG         | 60                         |
| <i>M. simiae</i>             | CGCCAAGGAGATCGAGCTGG          | 58                         | AGAAGGCCGTCGAGAAGGTCA       | 62.9                       | GGACAAGGTCGGCAACGAGGG         | 60                         |
| <i>M. smegmatis</i>          | CGCCAAGGAGATCGAGCTGG          | 58                         | AGAAGGCCGTCGAGAAGGTCA       | 62.9                       | GGACAAGGTCGGCAACGAGGG         | 60                         |
| <i>M. sphagni</i>            | CGCCAAGGAGATCGAGCTGG          | 58                         | AGAAGGCCGTCGAGAAGGTCA       | 62.9                       | GGACAAGGTCGGCAACGAGGG         | 60                         |
| <i>M. szulgai</i>            | CGCCAAGGAGATCGAGCTGG          | 58                         | AGAAGGCCGTCGAGAAGGTCA       | 62.9                       | GGACAAGGTCGGCAACGAGGG         | 60                         |
| <i>M. thermoresistibile</i>  | CGCCAAGGAGATCGAGCTGG          | 58                         | AGAAGGCCGTCGAGAAGGTCA       | 62.9                       | GGACAAGGTCGGCAACGAGGG         | 60                         |
| <i>M. timonense</i>          | CGCCAAGGAGATCGAGCTGG          | 58                         | AGAAGGCCGTCGAGAAGGTCA       | 62.9                       | GGACAAGGTCGGCAACGAGGG         | 60                         |
| <i>M. ulcerans</i>           | CGCCAAGGAGATCGAGCTGG          | 58                         | AGAAGGCCGTCGAGAAGGTCA       | 62.9                       | GGACAAGGTCGGCAACGAGGG         | 60                         |

**Supplementary Table 2:** In silico evaluation of 14 mycobacterial species that have < 100% primer sequence homology, but which are amplifiable at annealing temperatures  $\times$  55.5°C. Mismatched bases, as compared to the *M. abscessus* reference sequence, are highlighted in red.

| Mycobacterium Species      | Forward sequence 5'-3' | Annealing temp (°C) | Probe sequence 5'-3'  | Annealing temp (°C) | Reverse sequence 5'-3' | Annealing temp (°C) |
|----------------------------|------------------------|---------------------|-----------------------|---------------------|------------------------|---------------------|
| <i>M. vulneris</i>         | CGCCAAGGAGATCGAGCTGG   | 58                  | AGAAGGCCGTCGAGAAGGTCA | 62.9                | CCTGTTCCAGCCGTGGCTCCC  | 59.9                |
| <i>M. intracellulare</i>   | CGCCAAGGAGATCGAGCTGG   | 58                  | AGAAGGCCGTCGAGAAGGTCA | 62.9                | CCTGTTCCAGCTGTTGCTCCC  | 59.2                |
| <i>M. riyadhense</i>       | CGCCAAGGTCATCGTACTGG   | 58.8                | AGAAGGCCGTCGAGAAGGTCA | 62.9                | GGACAAGGTCGGCAACGAGGG  | 60                  |
| <i>M. rhodesiae</i>        | CGCCAAGGAGATCGAGCTGG   | 58                  | TCTTCCGGCAGCTCTTAGT   | 58.0                | GGACAAGGTCGGCAACGAGGG  | 60                  |
| <i>M. nonchromogenicum</i> | CGCCAAGGAGATCGAGCTCG   | 57.4                | AGAAGGCCGTCGAGAAGGTCA | 62.9                | GGACAAGGTCGGCAACGAGGG  | 60                  |
| <i>M. conspicuum</i>       | CGCCAAGGAGATCGAACTGG   | 57.2                | AGAAGGCCGTCGAGAAGGTCA | 62.9                | GGACAAGGTCGGCAACGAGGG  | 60                  |
| <i>M. shottsii</i>         | CGCCAAGGAGATCGAACTGG   | 57.2                | AGAAGGCCGTCGAGAAGGTCA | 62.9                | GGACAAGGTCGGCAACGAGGG  | 60                  |
| <i>M. microti</i>          | CGCCAAGGAGATCGAACTGG   | 57.2                | AGAAGGCCGTCGAGAAGGTCA | 62.9                | GGACAAGGTCGGCAACGAGGG  | 60                  |
| <i>M. rufum</i>            | CGCCAAGGAGATCGAGCTGG   | 58                  | TCTTCCGGCAGGTCTTCCAGT | 57.0                | GGACAAGGTCGGCAACGAGGG  | 60                  |
| <i>M. scrofulaceum</i>     | CGCCAAGGAGATCGAACTGG   | 58.8                | AGAAGGCCGTCGAGAAGGTCA | 62.9                | GGACAAGGTCGGCAACGAGGG  | 60                  |
| <i>M. senegalense</i>      | CGCCAAGGAGATCGAGCTGG   | 58                  | AGAAGGCCGTCGAGAAGGTCA | 62.9                | CCTGTACAGCCGTTGCTCCC   | 56.5                |
| <i>M. paragordoniae</i>    | CGCCAAGGAGATCGAGCTGG   | 58                  | TCTTCCGGCACCTTCCAGT   | 55.5                | GGACAAGGTCGGCAACGAGGG  | 60                  |
| <i>M. gadium</i>           | CGCCAAGGAGATCGAGCTGG   | 58                  | TCTTCCGGCACCTTCCAGT   | 55.5                | CCTGTTCCACCCGTTGCTCCC  | 59.2                |
| <i>M. shinjukuense</i>     | CGCCAAGGAGATCGAGCTGG   | 58                  | TCTTCCGGCACCTTCCAGT   | 55.5                | CCTGTTCCACCCGTTGCTCCC  | 59.2                |

**Supplementary Table 3:** Mycobacterial and non-mycobacterial species that require an annealing temperature  $\geq 55.3^{\circ}\text{C}$  for amplification.

| Bacterial Species                            | Forward sequence 5'-3' | Annealing temp ( $^{\circ}\text{C}$ ) | Probe sequence 5'-3'  | Annealing temp ( $^{\circ}\text{C}$ ) | Reverse sequence 5'-3' | Annealing temp ( $^{\circ}\text{C}$ ) |
|----------------------------------------------|------------------------|---------------------------------------|-----------------------|---------------------------------------|------------------------|---------------------------------------|
| <i>Geodermatophilus obscurus</i> _CP001867.1 | GCGGTTCTCTAGCTCGAGC    | 57.4                                  | TCTTCCGGCAGCTAGCCAGT  | 55.3                                  | GGACAAGGTCGGCAAGGAAGG  | 58.7                                  |
| <i>M. immunogenum</i>                        | GCGGGCCCTCTAGCTCGACC   | 54.9                                  | AGAAGGCCGTCGAGAAGGTCA | 62.9                                  | CCTGTTCCAGCCGTTGCTGCC  | 60                                    |
| <i>M. hodleri</i>                            | CGCCAAACAGACCGTGTGG    | 53.9                                  | AGAAGGCCGTCGAGAAGGTCA | 62.9                                  | GGACAAGGTCGGCAACGAGGG  | 60                                    |
| <i>M. europaeum</i>                          | CGCCAAGGAGATCGAGCTGG   | 58                                    | AGAAGGCCGTCGAGAAGGTCA | 53.2                                  | GGACAAGGTCGGCAACGAGGG  | 60                                    |
| <i>M. tuberculosis</i> H37Rv complete genome | CGCCAAGGAGATCGAGCTGG   | 58                                    | AGAAGGCCGGGAGGCGGTCT  | 49.3                                  | CCTGTTCCACCCGTTGCTCCC  | 59.2                                  |
| <i>Actinosynnema mirum</i> _CP001630.1       | GCGGTTCTCTAGCTCGAGC    | 57.4                                  | TCTTCCGGCAGCTCCGGCAGT | 48.5                                  | GGACAAGGTCGGCAAGGAAGG  | 50.8                                  |
| <i>Streptomyces coelicolor</i> 24427855      | GCGGTTCTCTAGCTCGAGC    | 57.4                                  | TCTTCCGGCAGCTCCGGCAGA | 47.4                                  | GGACAAGGTCGGCAAGGAAGG  | 50.8                                  |
| <i>M. triplex</i>                            | CGCCAAACTGACCGCGGTGG   | 47.2                                  | AGAAGGCCGTCGAGAAGGTCA | 62.9                                  | GGACAAGGTCGGCACCGAGGG  | 56.6                                  |
| <i>M. setense</i>                            | CGCCAACAGATCGTAGTGG    | 47.1                                  | AGAAGGCCGTCGAGAAGGTCA | 62.9                                  | GGACAAGGTCGGCAACGAGGG  | 60                                    |
| <i>M. paraseoulense</i>                      | CGCTAAAGAGACCGTACTGG   | 44.2                                  | AGAAGGCCGTCGAGAAGGTCA | 62.9                                  | GGACAAGGTTACCGCGAGGG   | 44.5                                  |
| <i>Nocardia farcinica</i> _IFM_10152         | CGCGCGTGACATCGACCTCG   | 48.1                                  | GGTTCGGCGGCTGCGCCAGA  | 42.1                                  | GACCACCGTCGGCAAGGACGG  | 50.6                                  |
| <i>M. aichiense</i>                          | CGCCAAAGTGACCGCGGTGG   | 47.2                                  | AGAAGGCCGTCGAGAAGGTCA | 62.9                                  | CCACCTGGTCCACAGCGAGGG  | 41.9                                  |
| <i>M. alvei</i>                              | CGATCAGGAGATCTGGGG     | 41.6                                  | AGAAGGCCGTCGAGAAGGTCA | 62.9                                  | CCTGACCACCGTTGCTCCC    | 50.5                                  |

Supplementary Table 3, continued

| Bacterial Species                             | Forward sequence 5'-3'                | Annealing temp (°C) | Probe sequence 5'-3'          | Annealing temp (°C) | Reverse sequence 5'-3'               | Annealing temp (°C) |
|-----------------------------------------------|---------------------------------------|---------------------|-------------------------------|---------------------|--------------------------------------|---------------------|
| <i>M. fallax</i>                              | CGCCAAGGAGATCGAGCTGG                  | 58                  | AGA <b>GCGCCAGCGAGCTGCTCA</b> | 41.0                | GGACAAGGTCGGCAACGAGGG                | 60                  |
| <i>Nocardia farcinica</i> _AF352577.1         | CG <b>CGGT</b> GACATCGA <b>CCTCG</b>  | 48.1                | TCTCCGGCAGCTC <b>CGGCACT</b>  | 40.5                | GGACAAGGTCGGCAA <b>GGAAGG</b>        | 50.8                |
| <i>Kineococcus radiotolerans</i> _CP000750.2  | GCGGTTCTCTAGCTCGA <b>GC</b>           | 57.4                | TCTCCGGCAGCTC <b>CGGCACT</b>  | 40.5                | <b>CGACAAGGTCGGCAA</b> <b>GGAAGG</b> | 49.7                |
| <i>M. canariensis</i>                         | GCGG <b>GCT</b> CTCTAGCTCGACC         | 48.1                | TCTCCG <b>CCGCTCCGCCAGA</b>   | 39.9                | GGACAAGGTCGGCAACGAGGG                | 60                  |
| <i>M. mageritense</i>                         | CG <b>ACAAGGTCGCCGT</b> GCTGG         | 39.3                | AGAAGGCCGT <b>CGAGAAGGTCA</b> | 62.9                | GGACAAGGTCGGCAACGAGGG                | 60                  |
| <i>M. insubricum</i>                          | CG <b>ACAAGGTGCCGA</b> ACTGG          | 39.3                | AGAAGGCCGT <b>CGAGAAGGTCA</b> | 60                  | GGACAAGGTCGGCAACGAGGG                | 60                  |
| <i>Rhodococcus opacus</i> _CP008947.1         | GCGG <b>GCCCTT</b> TAGCTCGA <b>GC</b> | 41.0                | TCTCCGGCAGCTC <b>CGGCAGT</b>  | 48.5                | <b>GTGGGCGCAGCCGTGGCTGCC</b>         | 38.1                |
| <i>Rhodococcus opacus</i> _B4 226237899       | GCGG <b>GCCCTT</b> TAGCTCGA <b>GC</b> | 41.0                | TCTCCGGCAGCTC <b>CGGCAGT</b>  | 48.5                | <b>GTGGGCGCAGCCGTGGCTGCC</b>         | 38.1                |
| <i>M. leprae</i>                              | CGCCAAGGAGATCGAGCTGG                  | 58                  | <b>CGTTCCGGCGGCTGCCACA</b>    | 37.9                | CCTGTTCCAGCCGT <b>GACTGCC</b>        | 50.6                |
| <i>Rhodococcus pyridinivorans</i> _CP006996.1 | <b>ACGGGCGAAGTACGTCCAGG</b>           | 37.5                | <b>AGCAGCTTTGGCCTTCTCGC</b>   | 46.4                | <b>GCCGTGGCCGAACTACTGCC</b>          | 47.8                |
| <i>Nocardia asteroides</i> _AF352019.1        | CGCCAAGGAGATCGAGCTGG                  | 58                  | <b>TTTTTCGGCAGCTTCGGCAGT</b>  | 36.4                | GGACAAGGTCGGCAA <b>GGAAGG</b>        | 50.8                |
| <i>M. chimaera</i>                            | CGCCAAGGAGATCGAGCTGG                  | 58                  | AGAAGGCCGT <b>CGAGAAGGTCA</b> | 62.9                | CCTGTTCCAG <b>GTGCCGCTGCC</b>        | 35.7                |

Supplementary Table 3, continued

| Bacterial Species                                       | Forward sequence 5'-3'                                            | Annealing temp (°C) | Probe sequence 5'-3'                                                     | Annealing temp (°C) | Reverse sequence 5'-3'                                                    | Annealing temp (°C) |
|---------------------------------------------------------|-------------------------------------------------------------------|---------------------|--------------------------------------------------------------------------|---------------------|---------------------------------------------------------------------------|---------------------|
| <i>M. aurum</i>                                         | GCGG <b>G</b> CTCTCTAGCTCGACC                                     | 48.1                | TCTTCCG <b>CCG</b> GCTC <b>CG</b> CCAGT                                  | 35.5                | GGACAAGGTCGGCAACGAGGG                                                     | 60                  |
| <i>M. massiliense</i>                                   | GCGG <b>G</b> TCC <b>AG</b> TAGCATGACC                            | 35.0                | AGAAGGCCGTCGAGAAGGTCA                                                    | 62.9                | GGACAAGGTCGGCAACGAGGG                                                     | 60                  |
| <i>M. madagascariense</i>                               | CGCC <b>C</b> AGG <b>T</b> CATCGAGCTGG                            | 50.7                | AG <b>GGC</b> AGAG <b>CG</b> AGC <b>T</b> GCACA                          | 34.7                | CCTG <b>G</b> T <b>ACT</b> ACTGTTGCTCCC                                   | 37.3                |
| <i>M. austroafricanum</i>                               | GCGGTTCC <b>A</b> CTAG <b>C</b> ATG <b>A</b> GC                   | 38.4                | AGAAGGCCGTCGAGAAGGTCA                                                    | 62.9                | CCTG <b>G</b> TCCAGCCGT <b>CG</b> T <b>T</b> GC                           | 34.5                |
| <i>M. llatzerense</i>                                   | CGCC <b>C</b> AGGAGATCG <b>T</b> AG <b>G</b> AC                   | 46.8                | AG <b>CG</b> CGCCG <b>CCG</b> CAAG <b>G</b> ACA                          | 45.0                | GGAC <b>T</b> GGAT <b>G</b> AC <b>GG</b> CGAC <b>G</b> G                  | 34.3                |
| <i>M. neworleansense</i>                                | CG <b>ACC</b> AGG <b>T</b> C <b>AC</b> CGA <b>ACT</b> GG          | 31.5                | AGAAGGCCGTCGAGAAGGTCA                                                    | 60                  | GGACAAGGTCGGCAACGAGGG                                                     | 60                  |
| <i>Nocardia cyriaci</i><br><i>georgica</i><br>374843763 | CGCC <b>GGCG</b> CCAG <b>C</b> AG <b>G</b> T <b>C</b> T           | 46.2                | <b>AG</b> CAGG <b>T</b> CG <b>CG</b> CC <b>T</b> T <b>C</b> GG           | 45.0                | <b>G</b> CCGT <b>GG</b> CC <b>G</b> AA <b>CT</b> ACT <b>G</b> GC          | 28.0                |
| <i>Tsakamurella tyrosinosolvans</i>                     | GCGGTTCTCTAGCTCGA <b>G</b> C                                      | 57.4                | T <b>TTTT</b> CGGCAGCT <b>T</b> CGG <b>C</b> AGT                         | 27.7                | GGACAAGGTCGGCAAG <b>G</b> A <b>G</b> G                                    | 50.8                |
| <i>Pseudonocardia dioxanivorans</i><br>_CP002593.1      | GCGG <b>C</b> AG <b>CC</b> GG <b>T</b> CG <b>T</b> CCAG <b>C</b>  | 40.1                | <b>G</b> GCAGGAG <b>G</b> T <b>CG</b> CAGAA <b>CC</b> GC                 | 26.9                | CCTG <b>CG</b> G <b>T</b> G <b>G</b> AA <b>CT</b> ACT <b>G</b> CC         | 27.5                |
| <i>Azospirillum brasilense</i><br>_HE577327             | GCGGTTCT <b>T</b> TAGCTCGA <b>A</b>                               | 58.4                | <b>T</b> GGAGCGGCAGCT <b>T</b> GGCAG <b>C</b> A                          | 26.8                | GGAG <b>A</b> AGGTCGGCAACGAGGG                                            | 59.4                |
| <i>Saccharothrix espanaensis</i><br>_DSM_44229          | <b>A</b> GGG <b>CC</b> GAAG <b>G</b> T <b>CG</b> TCCAG <b>C</b>   | 27.8                | TCTTCCGG <b>T</b> GGCT <b>CG</b> CTAG <b>C</b>                           | 31.3                | <b>G</b> GC <b>G</b> CGGCAG <b>CC</b> ACTAG <b>T</b> G <b>G</b> C         | 25.9                |
| <i>Gordonia bronchialis</i><br>_CP001802.1              | <b>A</b> GCCAATGAGATCGAGCTGG                                      | 55.3                | T <b>CG</b> TCC <b>A</b> CAGCT <b>G</b> CG <b>T</b> CAGT                 | 25.0                | GGACAAGGTCGGCAAG <b>G</b> A <b>G</b> G                                    | 50.8                |
| <i>Tsakamurella paurometabola</i><br>_CP001966.1        | CGCCAAGGAGATCGAGCT <b>G</b> G                                     | 57.4                | <b>G</b> GC <b>G</b> CCGG <b>G</b> CT <b>G</b> CG <b>G</b> CG <b>C</b> A | 24.2                | <b>G</b> ACCAAGG <b>T</b> GG <b>G</b> CG <b>C</b> CGAC <b>G</b> G         | 47.2                |
| <i>Pseudomonas aeruginosa</i><br>_CP000438.1            | <b>T</b> GCCAT <b>T</b> CTCGAT <b>C</b> AT <b>G</b> T <b>C</b> GC | 48.2                | T <b>CC</b> GGAA <b>G</b> CT <b>AC</b> CGAA <b>C</b> T <b>C</b> C        | 20.6                | CC <b>C</b> G <b>G</b> GAT <b>G</b> AA <b>CT</b> AG <b>T</b> G <b>C</b> C | 58.6                |

Supplementary Table 3, continued

| Bacterial Species                             | Forward sequence 5'-3' | Annealing temp (°C) | Probe sequence 5'-3'   | Annealing temp (°C) | Reverse sequence 5'-3' | Annealing temp (°C) |
|-----------------------------------------------|------------------------|---------------------|------------------------|---------------------|------------------------|---------------------|
| <i>Saccharopolyspora erythraea</i>            | GCGGTTCTCTAGCTCGAGC    | 57.4                | GGCGGCAGCTCGTGGAAACCGC | 20                  | GGACAAGGTCGGCAAGGAAGG  | 50.8                |
| <i>Pannonibacter phragmitetus</i> _CP013068.1 | ACGGTTCTTTAGCTCGACC    | 55.4                | TGGAGCGACGACGGCTTCGGC  | 18.6                | CGTCGCGCAGCCGTTGCTCCC  | 44.0                |
| <i>Escherichia coli</i> _MC4100               | ACGAGCACTTAGCTTGACC    | 18.2                | TGTTTCGCAATGGCGACGTC   | 20.2                | GGACAAAGTCGGTAAAGAAGG  | 37.0                |
| <i>Nocardia brasiliensis</i> _ATCC_700358     | GCGCGCGCTGTAGCTGGAGC   | 21.5                | GGTTCGGCGACTGCGCCAGC   | 26.8                | CTGGCAGCAGCCGTTCTGCC   | 16.1                |
| <i>Streptomyces lividans</i> _TK24_CP009124.1 | ACGGAAGCCGCTAGTACAGC   | 27.6                | AAGAGCTTCTGGACTTCCTC   | 15.6                | GCCGTGGCCGGAAGTACTGCC  | 47.8                |
| <i>Streptococcus pneumoniae</i> _749204398    | ATGGAAGTAGTTAGTACAAT   | 27.2                | CGTTGTCGACCTAGTGTAAC   | 14.6                | GCCTAGGCTGGAATTATGGC   | 27.8                |
| <i>Rhodococcus erythropolis</i> _CP003761.1   | GCGGGCACTCTAGCTCGAGC   | 40.9                | TGCGGCGTCGGCTGTCCAGC   | 13.9                | CACCCGTGTCGGAACCGACGG  | 15.7                |
| <i>Segniliparus rotundus</i> _CP001958.1      | GCGGGCGCTGTAGCTGGAGC   | 28.4                | GGTTCCCGGCTGCTCCACT    | 13.4                | TGGTTTCAGCCGTTCTGCC    | 40.5                |
| <i>Staphylococcus aureus</i> _NCTC_8325       | ATGGAAGAAGATTGTATAAT   | 24.9                | GAATGAAAAACATTTGTAAA   | 20.8                | GACGTGGATGAAACTATTGAC  | 12.7                |
| <i>Streptomyces hygrosopicus</i> _CP003720.1  | CGCCCGCGAGGTCGAGATCG   | 43.4                | TGCGGCGCAGTTCGGCAGA    | 11.7                | CCTGTTCCAGCCGTTCTGCC   | 51.7                |
| <i>Streptomyces hygrosopicus</i> .CP003275.1  | CGCCCGCGAGGTCGAGATCG   | 42.5                | TGCGGCGCAGTTCGGCAGA    | 11.7                | CCTGTTCCAGCCGTTCTGCC   | 51.7                |
| <i>Isoptricola variabilis</i> _225_CP002810.1 | GCGGGCGCCGCTCGTTCGACC  | 12.7                | AAGAGCTTGCCTCGCGTGGC   | 26.4                | GGCGCGCCGGAAGTACTGCC   | 11.0                |
| <i>Streptomyces glaucescens</i> _CP009438.1   | CGCCCGCGAGGTCGAGATCG   | 43.4                | TGCGGCGCAGTTCGGCAGA    | 10.7                | CCTGTTCCAGCCGTTCTGCC   | 51.7                |

**Supplementary Table 3, continued**

| <b>Mycobacterium Species</b>                   | <b>Forward sequence 5'-3'</b>          | <b>Annealing temp (°C)</b> | <b>Probe sequence 5'-3'</b>                     | <b>Annealing temp (°C)</b> | <b>Reverse sequence 5'-3'</b>           | <b>Annealing temp (°C)</b> |
|------------------------------------------------|----------------------------------------|----------------------------|-------------------------------------------------|----------------------------|-----------------------------------------|----------------------------|
| <i>Streptomyces vietnamensis</i> _CP010407.1   | CGCC <b>CG</b> CGAGGTCGAGATCG          | 43.4                       | T <b>CGGG</b> CGGCAGTT <b>CCGG</b> CAGA         | 10.7                       | CCTGTTCCAGCCGTT <b>CCTG</b> CC          | 51.7                       |
| <i>Rhodococcus equi</i> _103S_ATCC33701        | <b>ACGGG</b> CGT <b>CGGT</b> CGTCCAGG  | 24.3                       | <b>AGCAGGT</b> CCTGGCCTTC <b>GCTC</b>           | 17.6                       | <b>GTCG</b> GGCC <b>GGAACT</b> ACTGCC   | 8.8                        |
| <i>Gordonia polyisoprenivorans</i> _CP003119.1 | GCG <b>CG</b> CACTGCAGCTAGAGC          | 8.3                        | <b>CGTT</b> CCG <b>ACGG</b> CT <b>GCGGG</b> ACT | 26.2                       | CCT <b>CTGG</b> CAGCCG <b>CAGCT</b> GCC | 30.0                       |
| <i>Gordonia</i> sp.KTR9_CP002907.1             | GCG <b>GG</b> CGCTCTAG <b>GTCA</b> ACG | 29.3                       | <b>AACGT</b> GCAATCT <b>CGACT</b> GTGA          | 17.8                       | CCT <b>CATG</b> CACCCG <b>GCGT</b> TGCC | 7.8                        |
| <i>Rhodococcus jostii</i> .RHA1_CP000431.1     | <b>ACGGT</b> TC <b>AAGCT</b> CGTCCAGC  | 16.1                       | <b>TCGT</b> CGAGCGCG <b>GGAAG</b> AGCC          | 7.7                        | <b>GTCG</b> GGCC <b>GGAACT</b> ACTGAC   | 15.5                       |
| <i>Amycolatopsis methanolica</i> _CP009110.1   | GCGGT <b>CCCT</b> CA <b>CGT</b> CGACC  | 37.7                       | TCCTCTGGCAGCT <b>CGCC</b> AGC                   | 40.4                       | <b>CGCC</b> CCACCC <b>GCC</b> CTTCC     | 7.3                        |
| <i>Arthrobacter</i> sp 674646427               | GCG <b>GG</b> CGCGT <b>ACGT</b> CGAGG  | 5.3                        | <b>AACCG</b> TT <b>CCGGA</b> AGACCGGC           | 10.2                       | <b>GACG</b> CGCG <b>GGAACT</b> ACTGCC   | 11.1                       |
| <i>Nocardia nova</i> _SH22a_CP006850.1         | <b>GTGG</b> CGCG <b>GGT</b> CGTCCACC   | 2.1                        | <b>AGGAG</b> GT <b>CGC</b> CCCTTCCGGC           | 6.1                        | <b>GCCG</b> CGCCAG <b>GAACT</b> AGTGGC  | 46.7                       |
| <i>Arthrobacter sulfonivorans</i> _CP013747.1  | <b>ACGG</b> CGT <b>CGGT</b> CGTCCAGC   | 26.1                       | <b>CGTT</b> GGG <b>GAACCG</b> GGCCGG            | 29.2                       | <b>CGG</b> ACCG <b>GCCTT</b> GATGACTG   | 2.05                       |



**Supplementary Table 4.** Details of clinical samples used for assay validation.

| <b>Subject</b> | <b>Gender</b> | <b>Age</b> | <b>Sample type</b> | <b>Diagnosis</b>                                     |
|----------------|---------------|------------|--------------------|------------------------------------------------------|
| 1              | Female        | 64         | BAL                | Bronchiectasis                                       |
| 2              | Female        | 75         | BAL                | Rheumatoid arthritis with immunosuppression          |
| 3              | Female        | 67         | BAL                | Bronchiectasis                                       |
| 4              | Female        | 81         | BAL                | Bronchiectasis and gastro oesophageal reflux disease |
| 5              | Male          | 87         | BAL                | Chronic obstructive pulmonary disease                |
| 6              | Female        | 62         | BAL                | Asthma and lingular bronchiectasis                   |
| 7              | Female        | 72         | BAL                | Non-cystic fibrosis bronchiectasis                   |
| 8              | Female        | 71         | BAL                | Non-cystic fibrosis bronchiectasis                   |
| 9              | Female        | 59         | BAL                | No current diagnosis                                 |
| 10             | Male          | 69         | BAL                | Stem cell transplant patient                         |
| 11             | Female        | 60         | BAL                | Thyroiditis with chronic cough                       |
| 12             | Male          | 96         | BAL                | Lung cancer                                          |
| 13             | Female        | 64         | BAL                | Non-cystic fibrosis bronchiectasis                   |
| 14             | Female        | 52         | BAL                | Chronic cough                                        |
| 15             | Female        | 40         | BAL                | Mild bronchiectasis                                  |
| 16             | Female        | 73         | BAL                | Non-cystic fibrosis bronchiectasis                   |
| 17             | Female        | 75         | BAL                | Alpha-1 antitrypsin deficiency                       |
| 18             | Female        | 81         | BAL                | Non-cystic fibrosis bronchiectasis                   |
| 19             | Female        | 82         | BAL                | No current diagnosis                                 |
| 20             | Female        | 69         | BAL                | Chronic cough                                        |
| 21             | Female        | 74         | BAL                | Non-cystic fibrosis bronchiectasis                   |
| 22             | Female        | 14         | Sputum             | Cystic fibrosis                                      |
| 23             | Male          | 10         | Sputum             | Cystic fibrosis                                      |
| 24             | Female        | 4          | Sputum             | Cystic fibrosis                                      |
| 25             | Female        | 8          | Sputum             | Cystic fibrosis                                      |
| 26             | Male          | 10         | Sputum             | Cystic fibrosis                                      |
| 27             | Male          | 17         | Sputum             | Cystic fibrosis                                      |
| 28             | Male          | 10         | BAL                | Cystic fibrosis                                      |
| 29             | Male          | 10         | BAL                | Cystic fibrosis                                      |
| 30             | Male          | 10         | Sputum             | Cystic fibrosis                                      |
| 31             | Female        | 15         | Sputum             | Cystic fibrosis                                      |
| 32             | Male          | 10         | BAL                | Cystic fibrosis                                      |
| 33             | Female        | 12         | Sputum             | Cystic fibrosis                                      |
| 34             | Male          | 7          | BAL                | Non-cystic fibrosis bronchiectasis                   |
| 35             | Female        | 12         | BAL                | Cystic fibrosis                                      |
| 36             | Male          | 4          | BAL                | Cystic fibrosis                                      |
| 37             | Female        | 4          | BAL                | Cystic fibrosis                                      |
| 38             | Female        | 9          | BAL                | Cystic fibrosis                                      |
| 39             | Female        | 7          | BAL                | Non-cystic fibrosis bronchiectasis                   |
| 40             | Female        | 8          | Sputum             | Cystic fibrosis                                      |
| 41             | Female        | 16         | Sputum             | Cystic fibrosis                                      |
| 42             | Female        | 12         | Sputum             | Cystic fibrosis                                      |

**Supplementary Table 5:** Detection of NTM species from respiratory samples using culture-based and molecular approaches.

| Patient | Sample type | C <sub>T</sub> value | CFU/mL                 | qPCR/sequencing          | Diagnostic microbiology  |
|---------|-------------|----------------------|------------------------|--------------------------|--------------------------|
| 1       | BAL         | -                    |                        |                          |                          |
| 2       | BAL         | -                    |                        |                          |                          |
| 3       | BAL         | 30.5                 | 1.36 x 10 <sup>5</sup> | <i>M. avium</i>          | <i>M. avium</i>          |
| 4       | BAL         | -                    |                        |                          |                          |
| 5       | BAL         | -                    |                        |                          |                          |
| 6       | BAL         | 30.9                 | 1.02 x 10 <sup>5</sup> | <i>M. avium</i>          | <i>M. avium</i>          |
| 7       | BAL         | 32.1                 | 4.58 x 10 <sup>4</sup> | <i>M. intracellulare</i> | <i>M. intracellulare</i> |
| 8       | BAL         | 35.4                 | 1.13 x 10 <sup>4</sup> | <i>M. avium</i>          | <i>M. avium</i>          |
| 9       | BAL         | -                    |                        |                          |                          |
| 10      | BAL         | -                    |                        |                          |                          |
| 11      | BAL         | 34                   | 8.70 x 10 <sup>4</sup> | <i>M. avium</i>          | -                        |
| 12      | BAL         | -                    |                        |                          |                          |
| 13      | BAL         | 32.7                 | 3.02 x 10 <sup>4</sup> | <i>M. avium</i>          | <i>M. avium</i>          |
| 14      | BAL         | -                    |                        |                          |                          |
| 15      | BAL         | -                    |                        |                          |                          |
| 16      | BAL         | -                    |                        |                          |                          |
| 17      | BAL         | -                    |                        |                          |                          |
| 18      | BAL         | -                    |                        |                          |                          |
| 19      | BAL         | -                    |                        |                          |                          |
| 20      | BAL         | -                    |                        |                          |                          |
| 21      | BAL         | -                    |                        |                          |                          |
| 22      | Sputum      | 31.1                 | 3.22 x 10 <sup>4</sup> | <i>M. massiliense</i>    | <i>M. massiliense</i>    |
| 23      | Sputum      | 31.7                 | 2.08 x 10 <sup>4</sup> | <i>M. flavescens</i>     | -                        |
| 24      | Sputum      | -                    |                        |                          |                          |
| 25      | Sputum      | -                    |                        |                          |                          |
| 26      | Sputum      | 31.5                 | 2.44 x 10 <sup>4</sup> | <i>M. abscessus</i>      | <i>M. abscessus</i>      |
| 27      | Sputum      | 33.4                 | 6.43 x 10 <sup>3</sup> | <i>M. avium</i>          | -                        |
| 28      | BAL         | -                    |                        |                          |                          |
| 29      | BAL         | -                    |                        |                          |                          |
| 30      | Sputum      | -                    |                        |                          |                          |
| 31      | Sputum      | 35.5                 | 1.49 x 10 <sup>3</sup> | <i>M. avium</i>          | <i>M. avium</i>          |
| 32      | BAL         | -                    |                        |                          |                          |
| 33      | Sputum      | -                    |                        |                          |                          |
| 34      | BAL         | -                    |                        |                          |                          |
| 35      | BAL         | -                    |                        |                          |                          |
| 36      | BAL         | -                    |                        |                          |                          |
| 37      | BAL         | -                    |                        |                          |                          |
| 38      | BAL         | -                    |                        |                          |                          |
| 39      | BAL         | -                    |                        |                          |                          |
| 40      | Sputum      | -                    |                        |                          |                          |
| 41      | Sputum      | -                    |                        |                          |                          |
| 42      | Sputum      | -                    |                        |                          |                          |
